# Supplementary material for: Effect of Virtual Reality Training on Balance and Gait Ability in Patients With Stroke: Systematic Review and Meta-Analysis
Source: Oxford University Press journal article supplement (doi:10.2522/ptj.20160054), 2016-05-13
Supplement: ptj1905-efigure-2.pdf [file ptj1905-efigure-2.pdf]

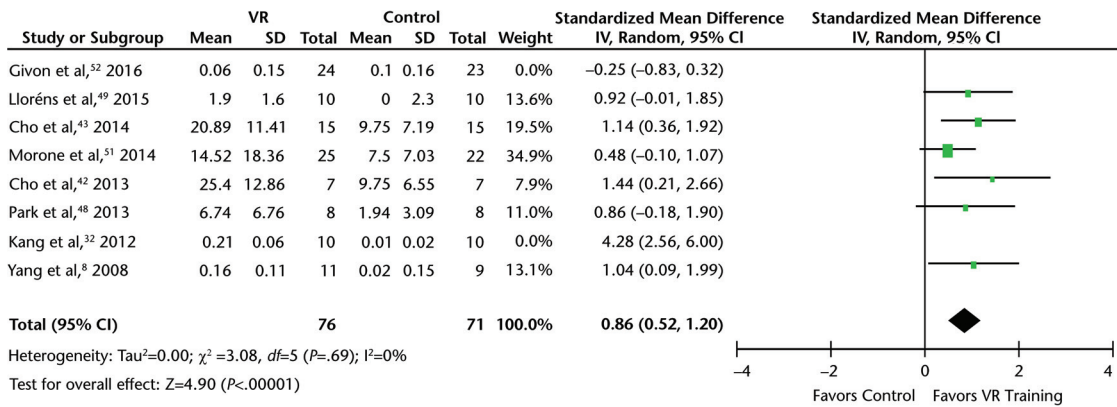

eFigure 1.

Sensitivity Analysis of the Pooled Results for Time Dose–Matched VR Training on Gait Speed (n=147)<sup>a</sup>

<sup>a</sup> VR=virtual reality, IV=inverse variance, CI=confidence interval.

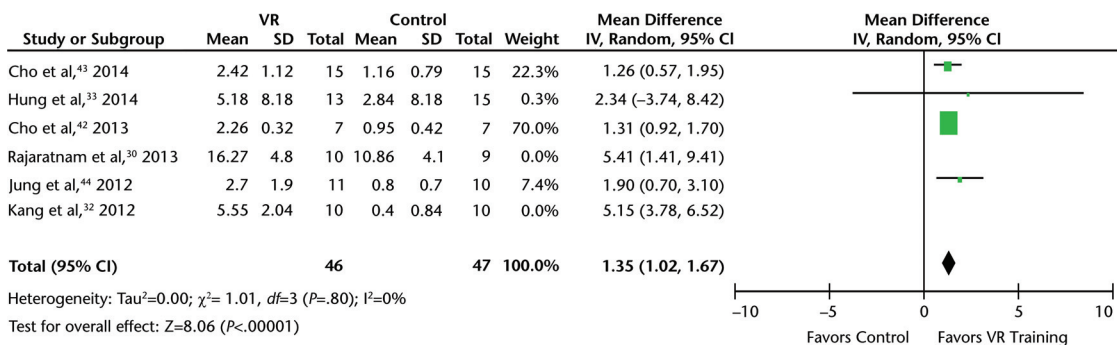

eFigure 2.

Sensitivity Analysis of the Pooled Results for Time Dose–Matched VR Training on the Timed “Up & Go” Test (n=93)<sup>a</sup>

<sup>a</sup> VR=virtual reality, IV=inverse variance, CI=confidence interval.
